# Supplementary material
Source: Springer Nature journal article supplement (https://www.springermedizin.de/resource/supplementary/12916_2013_893_MOESM1_ESM.pdf/9598564)
Supplement: MOESM1 [file 9598564]

## Supplementary Materials

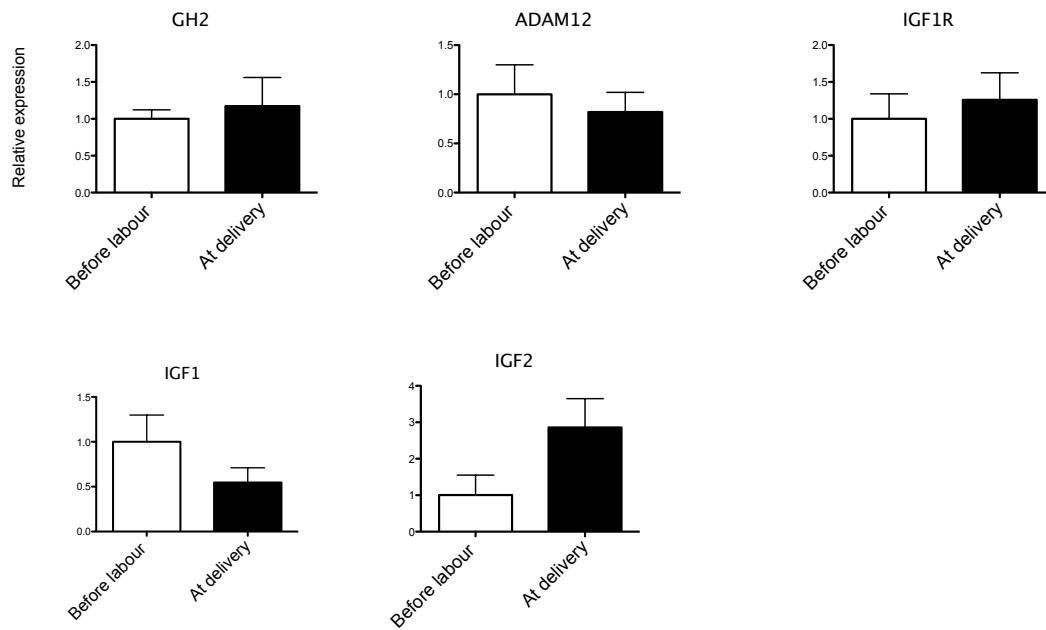

**Figure S1: Expression of growth genes across labour.**

Relative expression of mRNA coding five growth genes in paired maternal blood obtained just before labour commenced and at moment of delivery. GH: Growth Hormone; ADAM12: Disintegrin and metalloproteinase domain-containing protein 12; IGF1R: Insulin Growth Factor 1 receptor.

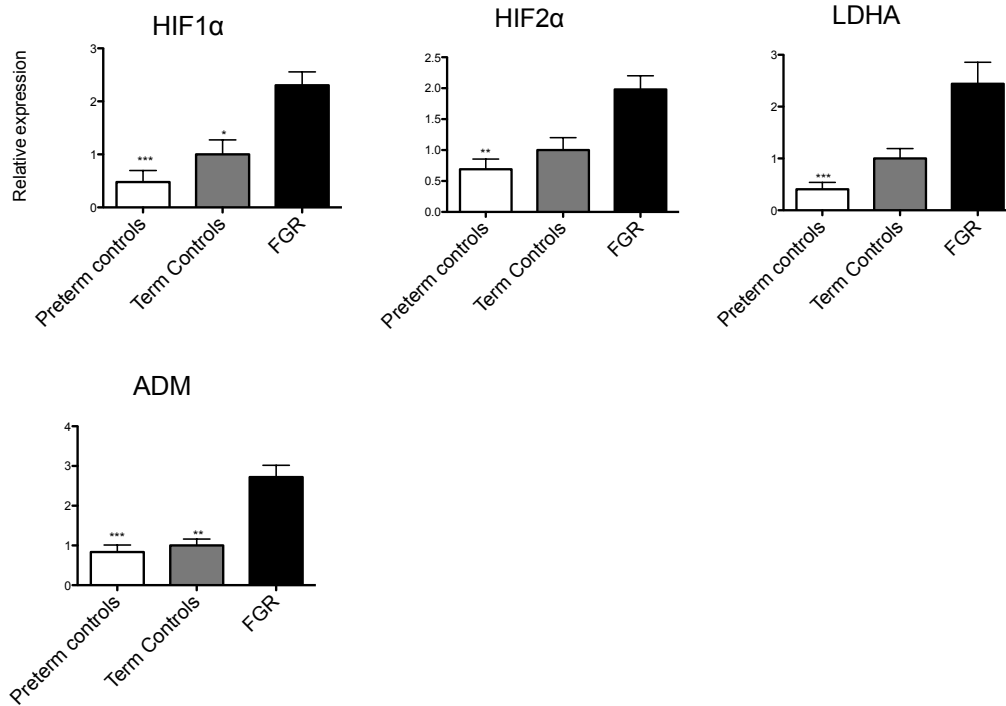

**Figure S2: Expression of hypoxia-induced mRNA in placentas complicated by severe preterm FGR.**

Relative mRNA expression of five hypoxia induced mRNA in placental specimens obtained from preterm controls (n=8), term controls (delivered >37 weeks gestation, n=8) and from cases of severe preterm fetal growth restriction (FGR, delivered under 34 weeks gestation, n=20). Comparisons were made between controls and the FGR cohort. \* P<0.05, \*\* P<0.01, \*\*\* P<0.001.

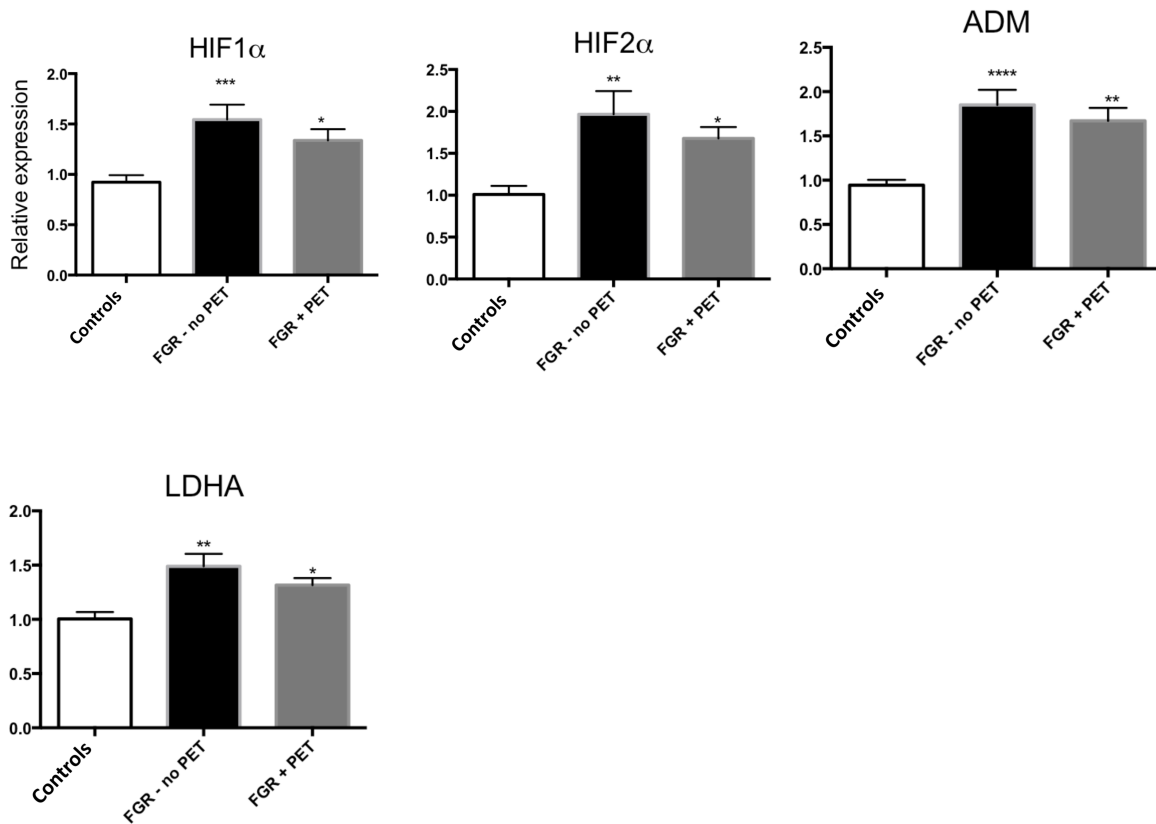

**Figure S3: Expression of hypoxia-induced mRNA blood, with the FGR cohort split according to whether there was concurrent preeclampsia (FGR + PET, n=8) or not (FGR no PET n=12).**

Comparisons between FGR - no PET vs FGR + PET were non-significant for all four genes ( $P \geq 0.41$ ). Remaining comparisons, as shown in the graphs, were made between both FGR groups and gestationally matched controls (pregnancies that progressed to delivery of an infant of normal birthweight at term). \* $P < 0.05$ , \*\*  $P < 0.01$ , \*\*\*  $P < 0.001$ , \*\*\*\*  $P < 0.0001$

**Table S1: Clinical characteristics for the cohort who were in labour**

The group was stratified according to whether the fetus was hypoxic (umbilical artery lactate concentrations >6.0 mmol/L) or not (umbilical artery lactate concentrations <6.0 mmol/L) at birth.

|                                                     |              | High lactate<br>(n=14) | Low lactate<br>(n=16) | P=      |
|-----------------------------------------------------|--------------|------------------------|-----------------------|---------|
| Age (yrs) <sup>a</sup>                              |              | 28.3 (6)               | 29.7 (5)              | 0.54    |
| Parity (% Primiparous)                              |              | 79                     | 75                    | 1.00    |
| Gestational Age (weeks) <sup>a</sup>                |              | 39+4 (9)               | 40 (13)               | 0.40    |
| Length of 1 <sup>st</sup> stage (mins) <sup>a</sup> |              | 414 (204)              | 540 (2620)            | 0.18    |
| Length of 2 <sup>nd</sup> stage (mins) <sup>a</sup> |              | 40 (49)                | 49 (61)               | 0.69    |
| Delivery Mode (%)                                   | SVD          | 64                     | 31                    | 0.27    |
|                                                     | Instrumental | 21                     | 38                    |         |
|                                                     | Caesarean    | 14                     | 31                    |         |
| Birthweight (gms) <sup>a</sup>                      |              | 3055 (523)             | 3385 (580)            | 0.114   |
| 1 minute apgar <sup>b</sup>                         |              | 9 (8-9)                | 9 (7-9)               | 0.94    |
| 5 minute apgar <sup>b</sup>                         |              | 9 (9-9)                | 9 (9-9)               | 0.75    |
| Cord lactate (mmol/L) <sup>a</sup>                  |              | 6.6 (1)                | 3.7 (1)               | <0.0001 |
| Admission to neonatal unit (%)                      |              | 36                     | 37.5                  | 1.00    |

<sup>a</sup>Mean (SD), <sup>b</sup> median (IQR).

**Table S2: Changes in expression of Hypoxia-induced mRNAs in paired maternal blood obtained just before labour commenced and samples obtained at the moment of birth.**

| Gene           | Fold change*   | p value          |
|----------------|----------------|------------------|
| <b>ADM</b>     | <b>2.4</b>     | <b>&lt;0.001</b> |
| <b>ANGPTL4</b> | <b>2.4</b>     | <b>&lt;0.001</b> |
| <b>ARNT</b>    | <b>1.9</b>     | <b>0.05</b>      |
| ARNT2          | 3.5 down       | 0.11             |
| ATP1B1         | 1.0            | 0.92             |
| <b>BHLHB30</b> | <b>1.8</b>     | <b>0.02</b>      |
| CAM2KG         | 1.5            | 0.18             |
| <b>CASP1</b>   | <b>2.3</b>     | <b>&lt;0.01</b>  |
| CREBBP         | 2.0            | 0.06             |
| <b>DDIT4</b>   | <b>4.2</b>     | <b>&lt;0.01</b>  |
| DDIT4L         | 0.95           | 0.94             |
| EDN1           | 1.1            | 0.45             |
| <b>EGLN1</b>   | <b>2.2</b>     | <b>&lt;0.01</b>  |
| <b>EGLN2</b>   | <b>2.1</b>     | <b>&lt;0.01</b>  |
| EGLN3          | Low expression |                  |
| EPO            | Low expression |                  |
| <b>EP300</b>   | <b>2.8</b>     | <b>&lt;0.01</b>  |
| FRAP1          | 1.5            | 0.27             |
| <b>HIF1</b>    | <b>2.3</b>     | <b>&lt;0.001</b> |
| <b>HIF1AN</b>  | <b>2.3</b>     | <b>&lt;0.001</b> |
| <b>HIF2A</b>   | <b>3.8</b>     | <b>&lt;0.001</b> |
| HIF3A          | Low expression |                  |
| <b>HIG2</b>    | <b>2.8</b>     | <b>0.03</b>      |
| <b>HMOX1</b>   | <b>1.7</b>     | <b>0.03</b>      |
| <b>HYOU1</b>   | <b>1.4</b>     | <b>0.04</b>      |
| <b>ING4</b>    | <b>1.9</b>     | <b>&lt;0.01</b>  |
| IGFBP1         | Low expression |                  |
| <b>LDHA</b>    | <b>2.1</b>     | <b>&lt;0.06</b>  |
| MB             | Low expression |                  |
| MT3            | Low expression |                  |
| NOS1           | Low expression |                  |
| NOS2A          | Low expression |                  |
| NOS3           | 0.9            | 0.87             |
| <b>NOTCH1</b>  | <b>2.0</b>     | <b>0.02</b>      |
| <b>PIK3CA</b>  | <b>1.7</b>     | <b>0.03</b>      |
| PRKAA1         | 1.3            | 0.25             |
| PRKAA2         | Low expression |                  |
| <b>PTEN</b>    | <b>2.2</b>     | <b>0.01</b>      |
| SLC2A8         | 1.4            | 0.20             |
| <b>SOD3</b>    | <b>1.8</b>     | <b>0.05</b>      |
| <b>TGFBR2</b>  | <b>1.8</b>     | <b>0.04</b>      |
| TP53           | 1.3            | 0.70             |
| VEGFA          | 1.5            | 0.10             |
| VHL            | 1.5            | 0.24             |

\* Fold changed measured on a Taqman PCR array.
